# Supplementary material for: A highly sensitive resonance Rayleigh scattering assay for detection of Hg(ii) using immunonanogold as probe
Source: Royal Society of Chemistry journal article supplement (doi:10.1039/c4ra02041c), 2014-01-01
Supplement: c4ra02041c1.pdf [file c4ra02041c1.pdf]

## A highly sensitive resonance Rayleigh scattering assay for detection of Hg(II) using immunonanogold as probe

Yanghe Luo<sup>a</sup>, Lili Xu,<sup>a</sup> Aihui Liang,<sup>a</sup> Anping Deng<sup>b</sup> and Zhiliang Jiang<sup>\*a</sup>

### Material Preparation:

**Apparatus and Reagents.** A model of Cary eclipse fluorescence spectrophotometer (US Varian, Inc.) was used to record the RRS spectra and the intensity, with PMT volt=500 v, excited slit=emission slit=5 nm, emission filter=1% T attenuator,  $\lambda_{\text{ex}}-\lambda_{\text{em}}=\Delta\lambda=0$ . A model of 79-1 magnetic stirrer with heating (Zhongda Instrumental Plant, Jiangsu, China), a model of SK8200LH ultrasonic reactor (Shanghai Kedao Ultrasonic Instrument Co., Ltd., with frequency of 59 kHz), and a model of FEI Quanta 200 FEG Field environmental scanning electron microscope (SEM) (Netherlands), a model of Nano-ZS90 nanoparticle and zeta potentiometric analyzer (Malvern, U.K.), and a model of thermostatic water bath (Shanghai No. 5 Medical Apparatus Plant, Shanghai, China) were used.

Methylmercury chloride ( $\text{CH}_3\text{ClHg}$ ), 6-mercaptopuronic acid (MNA), mercuric chloride ( $\text{HgCl}_2$ ), 3,3',5,5'-tetramethylbenzidine (TMB), bovine serum albumin (BSA), ovalbumin (OVA), Freund's complete and incomplete adjuvants, polyethylene glycol (PEG4000) were purchased from Sigma Chemical Co. (St Luis, Mo. USA). Cell medium and fetal calf serum was from Minhai (Lanzhou, China). Mouse SP2/0 myeloma cell was bought from the Cell Bank of Chinese Science Academy (Shanghai, China). BALB/C mice were purchased from Experimental Animal Center of Sichuan University (Chengdu, China). Monoclonal antibody (diluted the 100  $\mu\text{L}$  mAb with water to 2.0 mL) was prepared by coupling the new ligand 6-mercaptopuronic acid (MNA) with both methylmercury chloride ( $\text{CH}_3\text{ClHg}$ ) and carrier protein, and 1.0 mg/mL mercury ions



solution changed from dark red to red black and then turns red, at last no longer change. After continued to stirring for 10 min, it was diluted to 50 mL with water. The NG concentration was 58.0 mg/L Au, with a size of 10 nm.

**Adjustment of the pH of NG solution.** Because the combination of NG and mAb is done by physical force, the successful combination depends on the pH. In this experiment, we used a RRS technique to test the influence of different pH values on NG labeling. A 0.40 mL NG in tube was adjusted to different pH value, and then 50  $\mu$ L of mAb (1:1000) was added. After 5 min, 15  $\mu$ L of 10 % KCl solution was added to the tube, and diluted to 2.0 mL. We then used spectrofluorometer to determine the RRS intensity at 580 nm. Table 1 indicated that when the pH<7.0, the mAb do not stabilize the nanogold. When the pH is in 9.0-11.0 the intensity decreased and the system stabilize because coating of the nanogold by the mAb prevented NG aggregation by the KCl. Thus, a pH 9.0 was chosen for use.

**Table 1** Influence of different pH value of the NG labeled antibody

| pH                  | 6.0   | 7.0   | 8.0   | 9.0   | 10.0  | 11.0  | 12.0  |
|---------------------|-------|-------|-------|-------|-------|-------|-------|
| $I_{580\text{ nm}}$ | 443.5 | 233.0 | 205.4 | 158.9 | 163.5 | 154.7 | 288.2 |

**Selection of the ratio between NG and mAb.** We added different amounts of mAb (1:1000) to 0.40 mL NG solution of which the pH had been adjusted to 9.0. After 5 min, we added 15  $\mu$ L of 10 % KCl solution to each tube and mixed well. After 2 h, we measured the RRS intensity of each tube. Table 2 showed that the RRS intensities were stronger in the tubes with 20–40  $\mu$ L of mAb

than that with the 60-80  $\mu\text{L}$ . When the amounts of antiserum were greater than 200  $\mu\text{L}$ , the RRS intensities were small and remained stable. Thus, 200  $\mu\text{L}$  was the minimum amount of antiserum that stabilized 0.40 mL NG solution. The actual amount of antiserum was 100  $\mu\text{L}$  when 0.4 mL NG was labeled at this experiment.

**Table 2** Influence of amounts of mAb of the NG labeled antibody

| mAb ( $\mu\text{L}$ ) | 0     | 20    | 40    | 60   | 80   | 100  | 120  | 180  | 200  | 300  |
|-----------------------|-------|-------|-------|------|------|------|------|------|------|------|
| $I_{580\text{ nm}}$   | 552.1 | 471.5 | 125.1 | 69.5 | 69.7 | 54.8 | 47.6 | 44.6 | 27.2 | 25.4 |

**Preparation of immunonanogold.** During magnetic stirring, we added 125  $\mu\text{L}$  of mAb (1:1000) slowly to 5 mL NG with pH 9.0 that adjusted by 0.10 mol.L<sup>-1</sup> K<sub>2</sub>CO<sub>3</sub> and 0.10 mol.L<sup>-1</sup> HCl solution, keeping the dropping time for 5 min and stored at 4 °C. The ING concentration was 54.6  $\mu\text{g.mL}^{-1}$  Au. The nanogold was wrapped by mAb, and the scanning electron microscopy image is blurred.

**Supplementary Figures:**

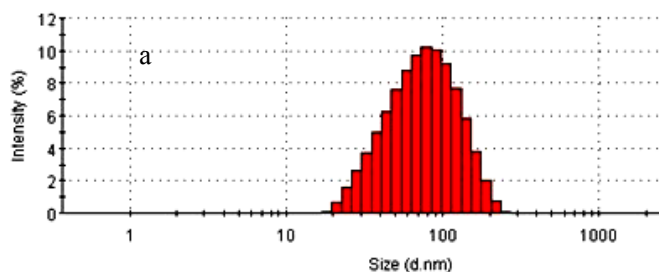

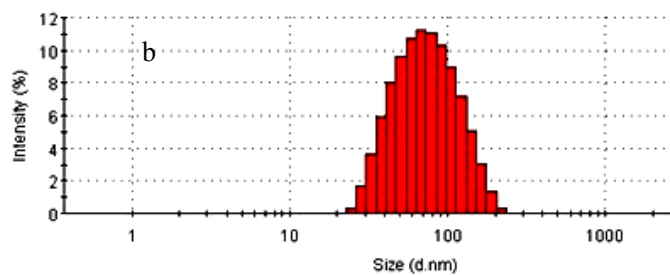

ESI,† Fig. S1 Laser scattering graph of the system

(a) pH 5.4 Na<sub>2</sub>HPO<sub>4</sub>- citric acid -10.9 μg.mL<sup>-1</sup> ING-37 °C -15 min; (b) a+ 1.5 μmol.L<sup>-1</sup> Hg<sup>2+</sup>.

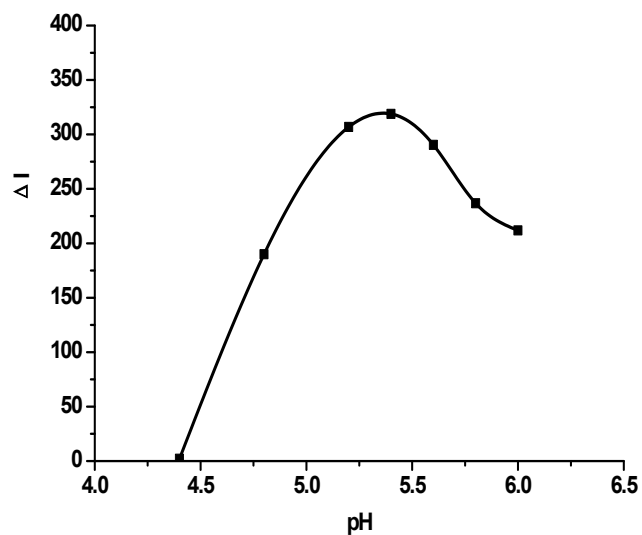

ESI,† Fig. S2 Effect of pH on  $\Delta I_{580\text{nm}}$

Na<sub>2</sub>HPO<sub>4</sub>-citric acid- 10.9 μg.mL<sup>-1</sup> ING -5.0 μmol.L<sup>-1</sup> Hg<sup>2+</sup>

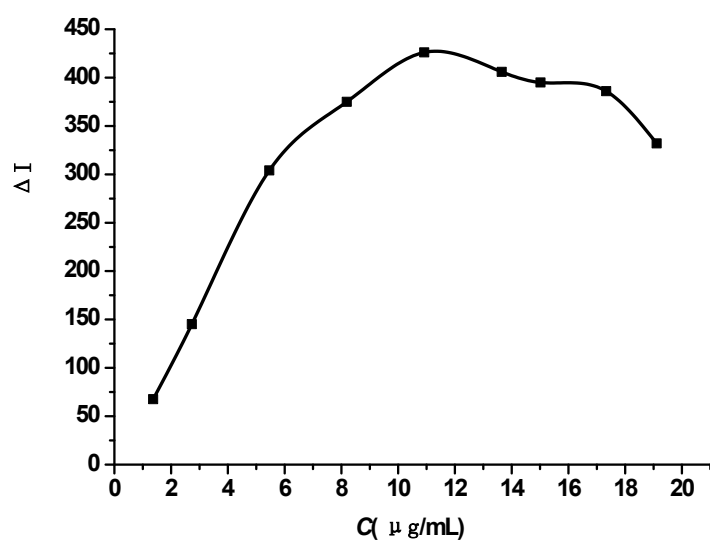

ESI,† Fig. S3 Effect of ING concentration  $\Delta I_{580\text{nm}}$

pH 5.4  $\text{Na}_2\text{HPO}_4$ -citric acid- $5.0 \mu\text{mol.L}^{-1} \text{Hg}^{2+}$ ,

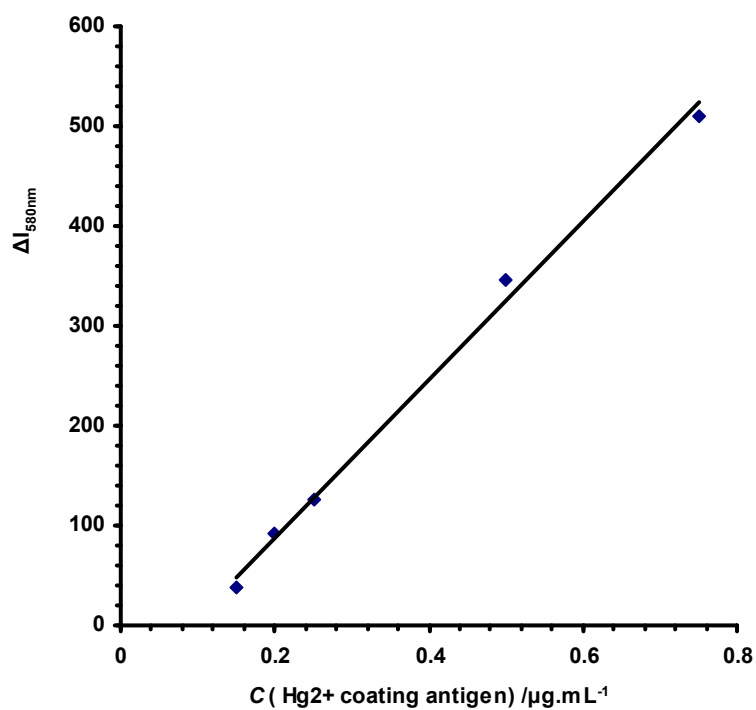

ESI,† Fig. S4 Working curve for the  $\text{Hg}^{2+}$  coating antigen

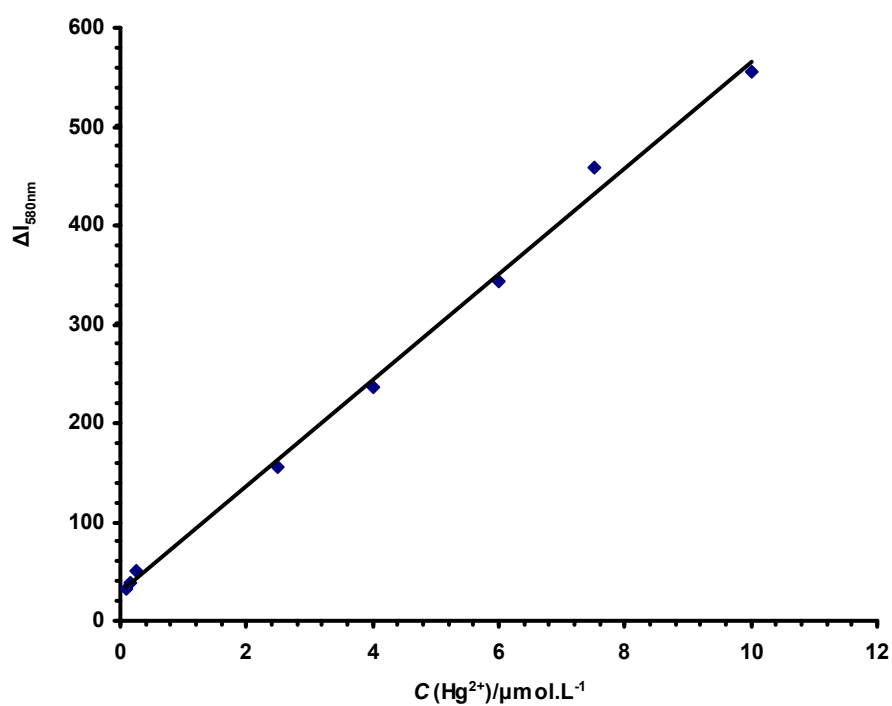

ESI,† Fig. S5 Working curve for Hg<sup>2+</sup>

**Supplementary Tables:**

ESI,† Tab. S1 Results for the determination of Hg<sup>2+</sup> in samples

| Sample | Single value            | Average  | RSD | added    | Recovery |
|--------|-------------------------|----------|-----|----------|----------|
|        | (μmol/L)                | (μmol/L) | (%) | (μmol/L) | (%)      |
| 1      | 2.3, 2.5, 2.4, 2.6, 2.6 | 2.48     | 5.3 | 2.5      | 99.2     |
| 2      | 2.4, 2.5, 2.7, 2.6, 2.4 | 2.52     | 5.2 | 2.5      | 100.8    |
| 3      | 2.4, 2.5, 2.6, 2.6, 2.5 | 2.52     | 3.3 | 2.5      | 100.8    |
